# Supplementary material
Source: MDPI journal article supplement (https://www.mdpi.com/2311-7524/9/9/1057)
Supplement: s1 [file s1]

**Table S3.** Sequences and lengths of motifs among cucumber Hsp70 proteins.

| Motif | Conserved amino acid sequences                     | Width |
|-------|----------------------------------------------------|-------|
| 1     | VKNAVVTVPAYFNDSQRQATKDAGVIAGLNVLRINEPTAAAJAYGJDKK  | 50    |
| 2     | PLSLGLETAGGVMTVLIPRNTTIPTKKEQVFSTYSDNQPGVLIQVYEGER | 50    |
| 3     | LGKFELSGIPPAPRGVPQIEVCFDIDANGILNVSAEDKTTGKKNKITITN | 50    |
| 4     | VIGIDLGTTYSCVAVWEGDRVEIANDZGNRTTPSYVAFTD           | 41    |
| 5     | GGGTFDVSJLTIEEGIFEVKATAGDTHLGGEDFDNRLVBHF          | 41    |
| 6     | IESLYEGKDFYSTITRARFEELNMDLFEKCMEPVEKCLRDAKLDKSDIHE | 50    |
| 7     | RLIGDAAKNQAAMNPENTVFDVKRLIGRRFS                    | 31    |
| 8     | FNGKEPCKSINPDEAVAYGAAVQAAILSG                      | 29    |
| 9     | EFKRKHKKDISKBPRALRRLRTACEKAKRELSSTTQTTIE           | 40    |
| 10    | YKGEEKQFAPEEISAMVLTKMKEIAEAYL                      | 29    |
